# Supplementary material for: Topical Nifedipine Administration for Secondary Prevention in Frostbitten Patients
Source: Front Physiol. 2020 Jun 19;11:695. doi: 10.3389/fphys.2020.00695 (PMC7326014; doi:10.3389/fphys.2020.00695)
Supplement: Supplementary file 1 [file Data_Sheet_1.XLSX]

## Sheet: Subject 1
	BASAL NON TREATED						COLD - NON TREATED 1st immersion						COLD - NON TREATED 2nd immersion						COLD - NON TREATED 3rd immersion
	HANDS DORSAL			HANDS VENTRAL			HANDS DORSAL			HANDS VENTRAL			HANDS DORSAL			HANDS VENTRAL			HANDS DORSAL			HANDS VENTRAL
	Min (ºC)	Max (ºC)	Avg (ºC)	Min (ºC)	Max (ºC)	Avg (ºC)	Min (ºC)	Max (ºC)	Avg (ºC)	Min (ºC)	Max (ºC)	Avg (ºC)	Min (ºC)	Max (ºC)	Avg (ºC)	Min (ºC)	Max (ºC)	Avg (ºC)	Min (ºC)	Max (ºC)	Avg (ºC)	Min (ºC)	Max (ºC)	Avg (ºC)
Region 1	32	35.7	33.5	30.1	33.9	32.4	13	17.4	15.1	14.5	22.6	16.7	12.2	16.3	13.5	14.4	21.2	16.6	12	15.2	13.3	14.2	17.7	15.6
Region 2	31.9	35.4	33.6	28.8	33.2	31	11.7	14.7	13.7	12.8	17.7	15.4	11	13.8	12.4	12.4	16.1	14.1	10.8	16.6	12.6	12.5	17.4	14.4
Region 3	32.6	35.8	34	29.7	33	31.1	11.9	14.7	13.5	12.8	18.3	15.5	11.2	14.1	12.5	12.5	18.3	14.6	11	15.3	12.9	12.3	17.2	14.5
Region 4	32.7	36	34.3	29.7	33.4	31.6	12.1	14.7	13.5	12.9	20.4	16	11.2	15.7	12.9	12.9	20.3	15.6	10.6	14.7	11.9	11.3	18.4	13.8
Region 5	32.1	35.7	34	30.1	33	31.5	11.9	15.1	13.1	13.2	20.3	15.5	12	22.6	16.2	15.3	24	19.3	11.4	16.1	12.8	12.3	19.9	14
Region 6	32.1	35.8	33.9	29.4	33.2	32	12.3	16.2	14.5	13.8	17.7	15.8	13.2	29	19.2	18.2	30	25.4	12.3	14.6	13.6	13.6	16.5	15.1
Region 7	30.7	35.3	33.4	28.3	32.9	30.7	12	14.4	13.3	13.1	17.5	15.1	10.9	14.6	12.3	12.6	17	14.5	10.7	13.9	12	11.9	14.9	13.4
Region 8	32	35.3	33.7	29.6	32.9	31.1	12.4	14.3	13.2	13.2	18.9	15.2	11.4	17	13.4	13.7	20.6	16.2	10.5	14.3	12.4	11.9	15.7	14
Region 9	32.3	35.4	33.8	29.9	32.7	31.3	11.9	14.1	13.1	12.5	19.9	15	12.9	23.9	16.9	16.4	24.1	19.5	11.3	13.8	12.2	11.7	17.4	13.6
Region 10	32.4	35.5	33.9	28.7	32.8	31.1	11.5	14.4	12.7	12	19.7	14.5	17	30.1	23.1	17.3	30	24.3	11.6	13.6	12.5	12.3	18.3	13.9
	BASAL NIFEDIPINE TREATED						COLD - NIFEDIPINE TREATED 1st immersion						COLD - NIFEDIPINE TREATED 2nd immersion						COLD - NIFEDIPINE TREATED 3rd immersion
	HANDS DORSAL			HANDS VENTRAL			HANDS DORSAL			HANDS VENTRAL			HANDS DORSAL			HANDS VENTRAL			HANDS DORSAL			HANDS VENTRAL
	Min (ºC)	Max (ºC)	Avg (ºC)	Min (ºC)	Max (ºC)	Avg (ºC)	Min (ºC)	Max (ºC)	Avg (ºC)	Min (ºC)	Max (ºC)	Avg (ºC)	Min (ºC)	Max (ºC)	Avg (ºC)	Min (ºC)	Max (ºC)	Avg (ºC)	Min (ºC)	Max (ºC)	Avg (ºC)	Min (ºC)	Max (ºC)	Avg (ºC)
Region 1	32.2	35.2	33.4	32.4	35.7	34.7	14.4	19.2	16.8	14.8	20.3	17	12.5	20.2	13.9	12.6	16.6	14.3	11.9	17.7	13.2	12	15.5	13.5
Region 2	31.3	34.6	33	32	35.1	33.7	13.7	17.4	16	13.9	18.6	16.4	11.9	13.9	12.9	12.2	15.3	13.7	11	13.8	12.4	11.9	14.3	12.9
Region 3	31.7	34.7	33.2	32.3	35.5	34	14	16.7	15.7	13.9	18.4	16.4	11.7	14.1	12.8	12.4	15.5	13.8	11.3	14.3	12.4	11.7	14.5	12.8
Region 4	32.9	35.2	34	32.6	35.8	34.4	13.5	16.8	15.4	13.6	20.3	16.6	12	15	13.1	12.8	17.8	14.6	11.5	13.8	12.5	11.7	15.8	13.3
Region 5	31.8	35	33.5	32.6	35.6	34.4	12.9	16.7	14.9	13.4	19.4	15.8	12.1	15.2	13.2	12.9	17.9	14.6	11.8	14.9	12.9	12.2	15.9	13.4
Region 6	30.9	35	33.3	32.5	35.5	34.4	14.5	18.4	16.6	14.3	19.5	17.1	13	17.9	14	13.9	18.5	15	12.1	15.1	13.2	12.9	16.7	13.8
Region 7	30.7	34.3	32.6	31.6	34.7	33.2	13.9	16.8	15.7	14.3	17.9	16.3	11.9	13.7	12.7	12.6	15.2	13.9	11.3	13.3	12.2	11.7	13.9	12.7
Region 8	31.4	34.5	32.9	31.4	34.8	33.4	13.7	16.9	15.5	14.2	17.6	15.9	11.6	14.3	12.6	12.6	16.3	14	11.3	13.4	12.2	11.7	14.7	12.8
Region 9	32.2	34.6	33.3	32.2	34.9	33.7	13.9	16.2	15.1	13.1	17.6	15.4	11.6	14	12.7	12.3	16	13.7	11.3	13.4	12.3	11.3	15.3	12.8
Region 10	31.2	34.5	33.2	31.8	34.9	33.6	13.3	16.6	14.7	12.9	18	15.1	12.1	17.7	13.9	12.6	17	14.5	11.8	14.2	12.8	12.1	15.7	13.2

## Sheet: Subject 2
	BASAL NON TREATED									COLD - NON TREATED 1st immersion									COLD - NON TREATED 2nd immersion									COLD - NON TREATED 3rd immersion
	HANDS DORSAL			HANDS VENTRAL			FEET (Dorsal)			HANDS DORSAL			HANDS VENTRAL			FEET (Dorsal)			HANDS DORSAL			HANDS VENTRAL			FEET (Dorsal)			HANDS DORSAL			HANDS VENTRAL			FEET (Dorsal)
	Min (ºC)	Max (ºC)	Avg (ºC)	Min (ºC)	Max (ºC)	Avg (ºC)	Min (ºC)	Max (ºC)	Avg (ºC)	Min (ºC)	Max (ºC)	Avg (ºC)	Min (ºC)	Max (ºC)	Avg (ºC)	Min (ºC)	Max (ºC)	Avg (ºC)	Min (ºC)	Max (ºC)	Avg (ºC)	Min (ºC)	Max (ºC)	Avg (ºC)	Min (ºC)	Max (ºC)	Avg (ºC)	Min (ºC)	Max (ºC)	Avg (ºC)	Min (ºC)	Max (ºC)	Avg (ºC)	Min (ºC)	Max (ºC)	Avg (ºC)
Region 1	34.1	36.7	35.6	34.7	36.6	35.7	31.1	34.1	32.7	16.6	20.5	18.1	18.3	22	19.6	14.5	17.5	16.4	14	18.2	15.5	16.8	20.5	18.2	10.6	14.9	11.9	13.5	17.1	14.9	15.5	19.1	16.7	10.4	12.2	11
Region 2	34.2	36.4	35.2	34.6	36.6	35.6	29.8	33	31.8	14.9	18.2	16.2	16.7	20.6	18.4	13.4	15	14.2	12.4	14.6	13.4	14.3	19.3	16.2	9.7	11.7	10.5	11.8	14.9	13.1	14	17.6	15.3	9.6	11.5	10.5
Region 3	34.3	36.3	35.1	34.3	36.4	35.4	30.1	33	31.9	15.1	17.4	16	16.6	20.6	18.2	13.9	15.8	14.6	12.2	14.4	13.1	13.6	17.4	15	9.8	12	10.8	11.4	14.7	12.7	13.4	16.5	14.7	10.2	12.3	11.1
Region 4	34.3	36.5	35.3	34.4	36.6	35.5	30	33.7	32	15.1	18.4	16	16.1	21.6	18.1	13.6	15.6	14.4	12.4	15.1	13.3	13.7	18.3	15.1	9.8	12.5	11	12	15.5	13.2	13.8	16.8	15	9.7	12.8	10.8
Region 5	34.2	36.4	35.2	34.2	36.6	35.2	30.1	34.4	32	15.2	19.9	16.4	16.8	22.3	18.4	13.3	16.4	14.8	12.9	16.7	13.9	13.9	19.7	15.6	10.2	14	11.7	12.2	16.2	13.7	13.9	18.5	15.3	10.3	14.4	12.4
Region 6	34.1	36.3	35.3	34.5	36.4	35.7	29.9	34	32.2	17.1	22.1	19.1	18.8	24.1	20.8	14.1	17.8	16.3	15.2	19.1	17.1	16.6	21.2	18.7	10.6	13.2	11.9	14.4	18.6	16.2	15.7	19.6	17.4	9.7	12	10.7
Region 7	34.2	35.9	35	34.9	36.6	35.6	29.8	33.1	31.7	15.2	18.3	16.4	18.2	22.4	20	12.8	14.8	13.6	13	16.2	14.3	15.7	19.9	17.7	9.2	11.6	10.3	12.5	16.2	14	15	19.6	16.9	8.9	11.5	9.9
Region 8	34	36	35	34.2	36.2	35.3	29.8	33.2	31.9	15.2	18.6	16.3	17.2	21.9	18.8	12.6	14.6	13.7	12.7	15.7	13.8	14.5	19.4	16.1	9.3	11.5	10.4	11.8	15.3	13.4	14	18.3	15.3	9.2	11	10
Region 9	34	36.2	35	34.3	36.5	35.2	29.5	33	31.2	14.8	18.6	15.9	16.7	20.8	18.4	12.7	15.1	13.8	12.5	16.2	13.6	13.8	17.6	15.4	9.6	13	10.7	11.8	15.4	13.2	13.6	16.7	15	9	13.7	10.8
Region 10	34	36.2	35.1	34.4	36.7	35.2	29.2	31.5	30.4	15	20.9	16.6	17.3	23.8	19	13.6	16.2	14.8	12.8	19.9	14.3	14.1	19.9	15.9	10	12.6	11.2	12.4	17.5	13.9	13.8	18.1	15.4	10.1	14	11.6
	BASAL NIFEDIPINE TREATED									COLD - NIFEDIPINE TREATED 1st immersion									COLD - NIFEDIPINE TREATED 2nd immersion									COLD - NIFEDIPINE TREATED 3rd
	HANDS DORSAL			HANDS VENTRAL			FEET (Dorsal)			HANDS DORSAL			HANDS VENTRAL			FEET (Dorsal)			HANDS DORSAL			HANDS VENTRAL			FEET (Dorsal)			HANDS DORSAL			HANDS VENTRAL			FEET (Dorsal)
	Min (ºC)	Max (ºC)	Avg (ºC)	Min (ºC)	Max (ºC)	Avg (ºC)	Min (ºC)	Max (ºC)	Avg (ºC)	Min (ºC)	Max (ºC)	Avg (ºC)	Min (ºC)	Max (ºC)	Avg (ºC)	Min (ºC)	Max (ºC)	Avg (ºC)	Min (ºC)	Max (ºC)	Avg (ºC)	Min (ºC)	Max (ºC)	Avg (ºC)	Min (ºC)	Max (ºC)	Avg (ºC)	Min (ºC)	Max (ºC)	Avg (ºC)	Min (ºC)	Max (ºC)	Avg (ºC)	Min (ºC)	Max (ºC)	Avg (ºC)
Region 1	31.5	33.7	32.7	31	33.3	32.4	20.6	22	21.4	16.9	19	17.8	18	21.3	19.3	12.9	15	14	14.1	16.6	15.2	15.3	18.8	16.6	11	12.7	12	13.6	16	14.9	15.1	17.9	16.1	10.7	13	11.9
Region 2	29.9	32.3	31	30.7	32.4	31.5	21.1	21.9	21.5	15	18.8	16.2	16.4	19.5	17.7	12.1	13.9	13	13.1	15	14	14.3	16.7	15.2	10.2	12.3	11.3	12.6	14.7	13.5	13.8	16.2	14.8	10.3	12.4	11.6
Region 3	29.4	31.5	30.5	30	31.8	31	21	22.4	21.4	15.3	17	16.1	16.5	19.6	17.6	12.4	14.2	13.4	13	15.3	13.9	13.7	16.1	14.7	10.3	12.8	11.7	12.4	14.9	13.3	13.2	16.2	14.2	10.4	12.5	11.8
Region 4	29.6	31.8	30.6	29.9	32	31.1	20.9	22.1	21.5	14.9	17.2	16	15.9	19.3	17.3	11.8	15.2	13.5	13	17.1	14	13.7	16.5	14.8	10.1	12.6	11.7	12.6	14.9	13.5	13.3	15.4	14.2	10.5	12.6	11.8
Region 5	29	31.7	30.4	29.8	32	30.6	21.3	23.1	22.2	14.6	18	15.8	15.7	19.8	17.2	11.9	14.5	13.5	13.4	16.1	14.3	13.4	17.3	14.8	10.1	12.7	11.7	12.9	15	13.7	13	15.7	14.3	10.4	13.2	11.9
Region 6	31.3	33.7	32.7	31.1	33.5	32.5	20.2	21.7	20.8	17.1	19.7	18.4	18.7	23.1	20.3	13	14.8	13.9	14.3	16.9	15.7	15.8	18.5	16.8	11.2	12.8	12	13.8	16.5	15.2	15.3	18.1	16.3	10.7	12.7	11.7
Region 7	30.9	32.6	31.7	31.1	32.8	32	20.5	22	21.3	15.1	17.3	16.1	16.8	21.6	18.6	12	13.8	13.1	13.3	15.4	14.2	14.4	18.5	15.9	10.3	12.2	11.2	13.1	15.1	13.9	14.2	17.5	15.6	10.2	12.1	11.2
Region 8	30.7	32.8	31.8	31.3	32.8	32	20.9	21.8	21.4	15.5	18.3	16.4	17	20.7	18.2	12.2	13.9	13.2	13.2	15.9	14.1	14.2	17.1	15.2	10.2	12.2	11.3	12.8	15	13.7	13.6	16	14.6	9.8	12	11.2
Region 9	30.8	32.9	31.8	30.9	32.8	31.8	20.5	21.8	21.3	14.9	17.3	15.8	15.8	19.5	17.6	12.5	13.8	13.3	12.9	15.5	13.9	13.5	17	14.9	10.2	12.3	11.4	12.6	15	13.5	13	15.6	14.2	9.6	12.4	11.3
Region 10	30.8	32.9	31.8	30.8	33.7	31.7	21	22.2	21.5	14.9	17.9	16	16	21.7	17.5	12.7	14	13.4	13.4	16.5	14.3	13.6	19.4	15.2	10.1	12.2	11.3	13.1	15.4	13.9	13	16.8	14.3	10.3	12.6	11.5

## Sheet: Subject 3
	BASAL NON TREATED									COLD - NON TREATED 1st immersion									COLD - NON TREATED 2nd immersion									COLD - NON TREATED 3rd immersion
	HANDS DORSAL			HANDS VENTRAL			FEET (Dorsal)			HANDS DORSAL			HANDS VENTRAL			FEET (Dorsal)			HANDS DORSAL			HANDS VENTRAL			FEET (Dorsal)			HANDS DORSAL			HANDS VENTRAL			FEET (Dorsal)
	Min (ºC)	Max (ºC)	Avg (ºC)	Min (ºC)	Max (ºC)	Avg (ºC)	Min (ºC)	Max (ºC)	Avg (ºC)	Min (ºC)	Max (ºC)	Avg (ºC)	Min (ºC)	Max (ºC)	Avg (ºC)	Min (ºC)	Max (ºC)	Avg (ºC)	Min (ºC)	Max (ºC)	Avg (ºC)	Min (ºC)	Max (ºC)	Avg (ºC)	Min (ºC)	Max (ºC)	Avg (ºC)	Min (ºC)	Max (ºC)	Avg (ºC)	Min (ºC)	Max (ºC)	Avg (ºC)	Min (ºC)	Max (ºC)	Avg (ºC)
Region 1	33	37.4	35.3	31.5	35.7	33.6	33.9	35.9	34.8	15	20.1	16.9	15.6	19.9	17.1	15.8	19.7	17.8	13.3	19.1	15.2	14.3	19	15.9	13.3	16.4	14.9	12	16.3	13.5	12.8	17.3	14.6	11.3	14.1	12.9
Region 2	31.2	35.2	33.1	30.7	34.1	32.6	33.5	35.6	34.8	14.5	17.8	16.2	14	19.4	16.7	15.4	18.5	16.6	12.7	15.5	14	13.7	16.7	14.9	13.3	15.5	14.1	11.6	14	12.6	12.2	15.1	13.4	11.9	13.6	12.7
Region 3	32.2	34.6	33.4	30.5	35	33	34.3	36.2	35.3	14.7	17.3	16	14.2	19.2	16.4	15.9	19.4	17.6	13.1	15.6	14	13.8	16.5	14.8	13.1	15.6	14.2	11.8	14.1	12.8	12.3	14.3	13.2	11.5	14.1	12.6
Region 4	32.3	36.7	34.7	31.3	36.1	33.5	33.7	36.6	35.1	14.3	17.7	15.6	14.2	18.2	15.9	16.2	19.4	17.5	13.6	16	14.4	13.8	17.3	15	12.7	15	13.8	12	14	12.9	12.2	14.5	13.1	11.7	14.8	12.9
Region 5	31.5	34.9	33.2	30.1	34.3	32.4	33.5	36.9	34.8	14	17.2	15.4	13.4	17.6	15.4	15.5	18.4	17.1	12.6	15.5	13.7	13.3	16.5	14.5	12.5	15.1	13.8	11.4	14.1	12.5	11.7	14.1	12.8	11.8	14.4	13.1
Region 6	32.9	36.7	34.7	32.1	35.2	33.6	33.4	37	35.4	14.5	18.9	16.4	14.7	20.5	16.5	16.4	19.5	18.2	13.4	17.4	14.6	14.2	18.6	15.8	14	16.3	15	11.7	14.2	12.8	12.5	15.9	13.8	11.9	14.4	13.2
Region 7	31.5	34.3	32.9	30.9	33.8	32.6	33.1	35.6	34.3	14.1	17.9	16	14	18	16.1	15.1	18.7	16.6	12.7	15.2	13.9	13.4	15.8	14.5	13.3	15.5	14.2	11.6	13.8	12.7	11.8	13.7	12.6	11.7	14.3	12.8
Region 8	31.9	34.4	32.9	30.6	34.3	32.7	33.4	36.1	35.1	14.3	17	16	13.6	17.8	15.7	16.1	19.2	18.1	12.7	15.3	13.9	13.3	15.8	14.3	13.5	16.4	15	11.9	14	12.6	11.6	13.7	12.4	11.9	14.9	13.4
Region 9	31.6	35.1	33.3	30.2	34.4	32.5	34.5	36.7	35.5	14.2	17.8	16	13.4	17.1	15.1	16.7	20	18.6	13.1	15.6	14.1	13.4	15.7	14.3	14	16.1	15.3	11.8	13.8	12.6	11.5	13.4	12.3	12.2	14.4	13.4
Region 10	31.9	34.4	33.4	31.2	34.7	32.7	33.5	36.8	34.8	14	16.9	15.3	13.3	18.3	15	16.8	21.7	18.8	13.2	14.9	14.1	13.7	17.3	14.7	13.7	16	15.1	11.7	13.9	12.6	11.6	14.1	12.6	12.4	14.1	13.4
	BASAL NIFEDIPINE TREATED									COLD - NIFEDIPINE TREATED 1st immersion									COLD - NIFEDIPINE TREATED 2nd immersion									COLD - NIFEDIPINE TREATED 3rd
	HANDS DORSAL			HANDS VENTRAL			FEET (Dorsal)			HANDS DORSAL			HANDS VENTRAL			FEET (Dorsal)			HANDS DORSAL			HANDS VENTRAL			FEET (Dorsal)			HANDS DORSAL			HANDS VENTRAL			FEET (Dorsal)
	Min (ºC)	Max (ºC)	Avg (ºC)	Min (ºC)	Max (ºC)	Avg (ºC)	Min (ºC)	Max (ºC)	Avg (ºC)	Min (ºC)	Max (ºC)	Avg (ºC)	Min (ºC)	Max (ºC)	Avg (ºC)	Min (ºC)	Max (ºC)	Avg (ºC)	Min (ºC)	Max (ºC)	Avg (ºC)	Min (ºC)	Max (ºC)	Avg (ºC)	Min (ºC)	Max (ºC)	Avg (ºC)	Min (ºC)	Max (ºC)	Avg (ºC)	Min (ºC)	Max (ºC)	Avg (ºC)	Min (ºC)	Max (ºC)	Avg (ºC)
Region 1	28	32.5	30.8	29.5	32.5	31.6	20.7	22	21.3	16.7	20.2	18.5	17.8	22	19.6	14.9	17.2	16.3	14.6	18.7	16.1	15.4	18.9	16.6	13.3	15.5	14.8	13.8	17.4	15.2	14.3	18.4	15.6	12.9	15	14.2
Region 2	23.4	26.7	24.7	24	26.6	25.3	20.7	22	21.4	15.1	17.4	16.5	15.4	18.5	17.1	15.3	16.8	16	14	16.3	15	14.5	17.6	15.7	14	15.3	14.6	13.5	15.5	14.5	13.8	15.6	14.6	13.3	14.8	14.2
Region 3	23.8	26.1	24.8	24.8	27.3	25.7	20.7	21.8	21.2	15.1	17.5	16.5	15.4	18.1	16.6	15.3	16.6	16.1	14.2	16.1	15.1	14.3	16.4	15.4	13.8	15.6	14.6	13.6	15.6	14.5	13.6	15.6	14.4	13.3	14.9	14.2
Region 4	27	30.5	28.9	25.6	30.5	28.7	20.7	21.9	21.3	15.6	17.8	16.9	15.6	18.6	16.9	15.6	16.6	16.1	14.5	16.5	15.4	14.8	17.2	15.7	13.9	15.7	14.8	13.8	15.7	14.7	13.4	15.8	14.6	13.4	14.9	14.2
Region 5	23.9	25.9	24.8	23.8	26.5	25.2	20.8	22.1	21.5	14.3	17.5	16	14.3	17.4	16	15.4	16.8	16.1	13.8	16.1	14.8	14.2	16.6	15.1	13.7	15.5	14.8	13.4	15.8	14.4	13.4	15.5	14.3	13.1	15.2	14.4
Region 6	24.6	25.8	25.2	25.1	27.5	26.3	20	21.5	20.7	15.2	18.2	16.5	16.4	20.7	17.7	15.2	17	16.1	14.6	17.9	15.6	15.2	18.7	16.4	13.8	15.5	14.5	14	16.6	14.9	14.3	17.4	15.5	12.9	14.9	14
Region 7	22.6	24.4	23.5	22.6	25	23.9	20.3	21.6	20.9	14.8	17	15.9	14.9	17.5	16.2	14.7	15.9	15.4	13.9	16	14.9	14.4	16	15.1	13.4	15.3	14.4	13.5	15.6	14.5	13.8	15.1	14.5	13.1	14.8	14
Region 8	22.4	23.7	23.1	22.7	24.9	23.5	20.4	21.7	21.1	14.8	16.7	15.8	14.6	17.3	15.7	15.6	16.8	16.2	13.8	16	14.9	14	15.9	14.9	13.6	15.7	14.8	13.6	15.6	14.6	13.4	15	14.2	13.2	15.1	14.3
Region 9	22.7	24.1	23.5	22.8	24.3	23.6	20.8	21.8	21.3	14.5	16.4	15.6	14.2	16.3	15.2	15.6	17	16.5	14	15.9	14.9	13.7	15.8	14.7	13.9	15.8	15.1	13.6	15.5	14.5	13.2	16.1	14	13.4	15.2	14.5
Region 10	23.1	24.7	23.8	22.8	24.9	24	20.8	21.8	21.4	14.1	16.8	15.5	14	17.4	15.5	15.9	16.8	16.4	13.6	16	14.7	13.8	16.6	15.1	14.1	15.6	15	13.5	15.6	14.4	13.3	15.4	14.3	13.7	15.2	14.6

## Sheet: Subject 4
	BASAL NON TREATED									COLD - NON TREATED 1st immersion									COLD - NON TREATED 2nd immersion									COLD - NON TREATED 3rd immersion
	HANDS DORSAL			HANDS VENTRAL			FEET (Dorsal)			HANDS DORSAL			HANDS VENTRAL			FEET (Dorsal)			HANDS DORSAL			HANDS VENTRAL			FEET (Dorsal)			HANDS DORSAL			HANDS VENTRAL			FEET (Dorsal)
	Min (ºC)	Max (ºC)	Avg (ºC)	Min (ºC)	Max (ºC)	Avg (ºC)	Min (ºC)	Max (ºC)	Avg (ºC)	Min (ºC)	Max (ºC)	Avg (ºC)	Min (ºC)	Max (ºC)	Avg (ºC)	Min (ºC)	Max (ºC)	Avg (ºC)	Min (ºC)	Max (ºC)	Avg (ºC)	Min (ºC)	Max (ºC)	Avg (ºC)	Min (ºC)	Max (ºC)	Avg (ºC)	Min (ºC)	Max (ºC)	Avg (ºC)	Min (ºC)	Max (ºC)	Avg (ºC)	Min (ºC)	Max (ºC)	Avg (ºC)
Region 1	34.4	36.1	35.3	33.7	35.7	34.7	31.9	35.5	34	21.6	25.4	23.2	20.5	25.8	22.5	19.9	23.7	21.6	18.2	21.3	19.7	16.5	21.4	18.4	15	20.6	16.7	15.6	18.7	17.3	14.8	18.6	16.5	13.8	18.1	15.1
Region 2	34.2	36	35.1	32.3	35.6	34	32.5	34.6	33.5	19.2	24.3	21.2	18.6	22.9	19.8	17.6	24.2	20.6	17.4	24.2	19.9	15	24.8	17.2	14.1	18.6	15.6	16	23	18.6	14.2	23.6	16.2	13.6	16.1	14.5
Region 3	34.3	36.1	35.3	32.8	35.5	34.1	33.2	34.7	34	19.1	24.2	21.2	18.9	22.6	20.1	19.1	24.3	21.6	16.2	19.8	17.5	15	20.1	16.4	15.1	19.1	16.9	14.6	18.4	16.2	13.8	19.7	15.3	14.1	15.9	14.8
Region 4	34.1	36.1	35.2	32.6	35.7	34.1	33.1	35	33.8	19.3	25.5	21	18.4	21.9	19.7	16.9	23.5	19.7	16	20.3	17.3	14.9	18.4	16.2	14	17.7	15.1	14.6	19.4	16	14	17.4	15.1	13.5	15.5	14.3
Region 5	34.1	35.9	35.1	33	35.5	34.2	33.4	36.5	34.8	19.6	27.8	21.6	18.5	22.9	20	19.9	22.1	21	17	21.8	19.2	15.3	21.7	17.5	15.9	18.6	17.1	14.9	20.5	16.6	14.4	19.7	15.9	14.5	16.3	15.5
Region 6	34.7	36	35.5	34.1	35.7	35.1	33.3	36	35	20.9	25.4	22.6	21	25.9	22.8	18.9	22.7	21	19.1	22.4	20.6	18.3	21.8	19.7	13.9	16.7	15.2	18.3	21.7	19.9	16.5	20.8	18.2	12.7	15.7	14.2
Region 7	34.1	36.1	35.4	32.3	35.5	33.9	33.4	35.1	34.1	17.8	23.1	21	18.7	22	19.9	16.4	21.2	17.6	17.6	21.8	19.3	15	21.1	16.5	12.8	15.3	13.8	16.9	22.6	19	14.4	23	16.3	12.3	14.7	13
Region 8	33.1	35.9	35	32.2	35.1	33.5	34.6	35.9	35.1	17.3	23	20.2	17.6	22.1	19.3	18.2	22.1	19.6	15	19.6	17.1	14.5	18.1	15.7	12.6	15.2	13.8	13.9	18.6	15.7	13.7	17.4	15	12.7	14.4	13.5
Region 9	32.7	36	34.6	31.9	35.4	33.3	33.7	36.2	34.9	16.8	22.7	19.5	17.6	22.4	19.3	18.7	23.3	19.9	14.6	19.2	16.3	14.4	18.2	15.9	12.4	15.3	13.7	13	18	15.1	13.6	19	14.9	13.4	16.6	14.1
Region 10	31.9	35.8	33.8	30.2	34.7	32.5	33.5	36.3	35.1	16.3	24.4	18.4	16.9	24.3	19.7	18.1	21.9	19.7	13.6	18.3	15.2	14.4	18.4	15.7	12.9	19.6	14.9	12.8	19.1	14.6	13.9	19	15.2	13.9	17.9	15.4
	BASAL NIFEDIPINE TREATED									COLD - NIFEDIPINE TREATED 1st immersion									COLD - NIFEDIPINE TREATED 2nd immersion									COLD - NIFEDIPINE TREATED 3rd
	HANDS DORSAL			HANDS VENTRAL			FEET (Dorsal)			HANDS DORSAL			HANDS VENTRAL			FEET (Dorsal)			HANDS DORSAL			HANDS VENTRAL			FEET (Dorsal)			HANDS DORSAL			HANDS VENTRAL			FEET (Dorsal)
	Min (ºC)	Max (ºC)	Avg (ºC)	Min (ºC)	Max (ºC)	Avg (ºC)	Min (ºC)	Max (ºC)	Avg (ºC)	Min (ºC)	Max (ºC)	Avg (ºC)	Min (ºC)	Max (ºC)	Avg (ºC)	Min (ºC)	Max (ºC)	Avg (ºC)	Min (ºC)	Max (ºC)	Avg (ºC)	Min (ºC)	Max (ºC)	Avg (ºC)	Min (ºC)	Max (ºC)	Avg (ºC)	Min (ºC)	Max (ºC)	Avg (ºC)	Min (ºC)	Max (ºC)	Avg (ºC)	Min (ºC)	Max (ºC)	Avg (ºC)
Region 1	34.3	36	35.3	34	36	35.1	22	23.3	22.7	20.1	22.6	21.2	19.7	22.8	20.7	15.7	17.7	16.7	15	17.9	16.6	13.8	18.8	15.9	13.4	15.5	14.1	12.9	18.1	14.7	12.4	16.7	14.1	11.2	13.1	12
Region 2	33.6	36.1	35.2	32.5	36.1	34.4	22.4	23.5	23	17.9	21.5	20.1	18	20.8	19.2	15.2	17.4	16.1	13.6	16.2	14.8	13	15.8	14.1	13.3	15	14.1	12.3	15.5	13.6	11.7	14.3	12.8	11.3	12.8	12
Region 3	33.9	36	35.1	32.6	36.1	34.2	23	24.7	23.6	17.9	22.1	19.9	18	22.4	19.3	15.8	18.5	16.8	12.9	16.8	14.4	12.8	15.9	14.1	13.8	15.3	14.6	11.5	15.1	13	11.6	14.2	12.8	11.6	13	12.3
Region 4	33.8	36.1	35	32.9	36.2	34.6	24.7	25.9	25.3	17.2	21.4	19.1	17.3	21.9	18.8	15.7	18.2	16.7	12.3	16.7	14	12.5	16.1	13.9	13.3	15.5	14.1	11.8	15	13	12	14.3	12.9	11	12.7	12
Region 5	33.7	36	35	33.1	36	34.7	26.9	28.1	27.6	18	23.6	19.5	17.9	23.4	19.3	17.5	19.9	18.4	13.5	18.5	15.1	13.4	17.4	14.8	13.6	16.2	15.1	12.5	17.3	13.8	12.3	16.5	14	11.7	13.8	12.7
Region 6	33.5	35.4	34.8	33.7	35.7	35	30.5	33.7	32.7	18.4	24.7	20.7	18.8	24.3	21.3	18.5	22.1	20.7	14.9	20.8	17	14.2	19.4	16.3	13.7	16.7	15.3	13.6	18.2	15.4	12.7	17.2	14.4	11.4	13.8	12.5
Region 7	33.2	35.9	34.7	31.4	35.3	33.7	30.4	32.6	31.1	16.6	22	19.9	17.9	21.4	19.1	17	20.6	17.9	12.9	16.6	14.6	13	15.5	14	12.5	14.8	13.6	11.8	14.7	13	11.7	13.7	12.6	10.5	12.7	11.4
Region 8	32.8	35.7	34.8	32	35.4	33.7	32.2	33.4	32.8	16.3	21.4	19.4	16.7	22.5	18.5	18.3	20.9	19.9	12.4	16	14.1	12.9	15.5	13.8	13.4	15.7	14.5	11.5	14.7	13.1	11.4	14	12.6	10.5	13.1	11.9
Region 9	32.7	35.4	34.5	32.3	35.7	34	32.1	34	33.1	16.2	21.4	19	16.9	22.1	18.8	19	22.6	20.3	12.1	15.9	13.8	13	15.5	13.9	14.1	16.5	15.1	10.9	14.9	12.8	11.8	14.7	13	11.2	13.1	12.2
Region 10	31	35.3	33.3	30.5	35.1	32.9	31.7	33.8	32.9	15.8	20.8	17.7	16.3	21.8	18.7	19.5	25.5	21.5	11.8	17.4	13.6	12.7	16.3	14.1	14.3	16.9	15.4	11.2	13.9	12.2	12.4	15.3	13.3	11.3	13.2	12.4

## Sheet: Subject 5
		BASAL NON TREATED									COLD - NON TREATED				1st immersion				COLD - NON TREATED				2nd immersion					COLD - NON TREATED				3rd immersion
	HANDS DORSAL			HANDS VENTRAL			FEET (Dorsal)			HANDS DORSAL			HANDS VENTRAL			FEET (Dorsal)			HANDS DORSAL			HANDS VENTRAL			FEET (Dorsal)			HANDS DORSAL			HANDS VENTRAL			FEET (Dorsal)
	Min (ºC)	Max (ºC)	Avg (ºC)	Min (ºC)	Max (ºC)	Avg (ºC)	Min (ºC)	Max (ºC)	Avg (ºC)	Min (ºC)	Max (ºC)	Avg (ºC)	Min (ºC)	Max (ºC)	Avg (ºC)	Min (ºC)	Max (ºC)	Avg (ºC)	Min (ºC)	Max (ºC)	Avg (ºC)	Min (ºC)	Max (ºC)	Avg (ºC)	Min (ºC)	Max (ºC)	Avg (ºC)	Min (ºC)	Max (ºC)	Avg (ºC)	Min (ºC)	Max (ºC)	Avg (ºC)	Min (ºC)	Max (ºC)	Avg (ºC)
Region 1	29.9	33.3	31.5	29.4	33.4	31.6	27.9	31.1	29.7	15.2	19.3	16.9	15.8	21.8	18.1	14.1	17.8	16.3	12.9	16.8	14.2	13.5	16.8	14.9	12.6	14.8	13.8	12.6	15.2	13.6	13.6	16.2	14.7	11.9	13.7	12.8
Region 2	28.4	31.7	30.3	28.6	32	30.5	27.7	29.8	28.8	14.5	18	16.2	14.5	18	16.2	13	14.6	14	12.6	14.5	13.5	12.9	15.3	13.9	11.8	13.7	12.8	12.4	14.5	13.3	13	14.5	13.7	11.7	13.5	12.6
Region 3	28.4	31.5	30.5	28	32.4	30.7	27.7	30.8	29.1	14.4	17.9	16.1	14.4	17.8	15.8	12.6	14.8	13.4	12.4	14.5	13.4	12.8	15.5	13.8	11.4	13.6	12.6	12.3	14.6	13.3	12.4	16.1	13.6	10.9	13.4	12.3
Region 4	28.2	32.2	30.6	27.8	32.5	30.6	27.7	31.7	29.4	14.2	17.8	15.8	14.2	19	15.7	12.6	15.2	13.7	12.6	14.6	13.5	13.1	17.5	14.6	11.2	13.9	12.7	12.7	14.5	13.4	13.1	17	14.3	11.2	13.8	12.3
Region 5	27.8	32.2	30.4	27.2	31.9	29.8	27.3	31.1	29	14.2	17.6	15.5	13.9	17.8	15.3	13.1	16.9	14.6	12.9	15.4	13.8	13.2	16.3	14.2	12.2	14.6	13.4	12.7	14.9	13.6	12.8	15.4	13.9	11.5	13.7	12.8
Region 6	30.8	33.4	32.4	29.9	33.3	31.6	27.7	30.4	29.2	15.1	21.4	17.3	15.5	20.6	17.2	14.6	17.5	16.3	13.2	16.6	14.6	14	17.5	14.9	12.1	14.7	13.6	13.1	17.3	14.2	14.1	17.4	15.1	11.5	14.5	12.8
Region 7	30.2	32.1	31.2	29.4	32.9	31.4	26.9	29.8	28	14.4	18	16.1	14.6	18.9	16.5	13.7	16	14.7	12.8	14.7	13.6	13.1	15.8	14.2	12.4	13.8	13	12.6	14.4	13.4	13.1	15.9	14.2	11.6	13.9	12.6
Region 8	30.1	32.2	31.2	29.4	32.8	31.3	26.4	29.2	27.7	14.6	17.9	16.1	14.4	18.4	16	12.9	15	14	12.8	14.7	13.6	13	15.8	14	12.2	13.9	13	12.7	14.7	13.4	13	16	14.1	11.1	13.6	12.4
Region 9	30	32.6	31	29.1	32.3	31	26.6	30.1	28.5	14.2	18	15.6	14	17.8	15.3	13.3	16.7	14.6	12.7	14.6	13.5	12.8	16.7	14.2	12.1	14.4	13.2	12.8	14.7	13.6	13.2	17	14.4	11.9	13.5	12.7
Region 10	29	32.6	30.9	28.7	32	30.3	27.2	31	29.2	14.2	17.3	15.4	13.7	17.6	15.1	14.7	17	15.9	13.3	16.9	14.2	13.2	16.5	14.3	13.3	15.1	14.1	13.2	15.8	14	13.1	16	14.1	12.4	14.1	13.3
		BASAL NIFEDIPINE TREATED								COLD - NIFEDIPINE TREATED					1st immersion				COLD - NIFEDIPINE TREATED				2nd immersion					COLD - NIFEDIPINE TREATED				3rd immersion
	HANDS DORSAL			HANDS VENTRAL			FEET (Dorsal)			HANDS DORSAL			HANDS VENTRAL			FEET (Dorsal)			HANDS DORSAL			HANDS VENTRAL			FEET (Dorsal)			HANDS DORSAL			HANDS VENTRAL			FEET (Dorsal)
	Min (ºC)	Max (ºC)	Avg (ºC)	Min (ºC)	Max (ºC)	Avg (ºC)	Min (ºC)	Max (ºC)	Avg (ºC)	Min (ºC)	Max (ºC)	Avg (ºC)	Min (ºC)	Max (ºC)	Avg (ºC)	Min (ºC)	Max (ºC)	Avg (ºC)	Min (ºC)	Max (ºC)	Avg (ºC)	Min (ºC)	Max (ºC)	Avg (ºC)	Min (ºC)	Max (ºC)	Avg (ºC)	Min (ºC)	Max (ºC)	Avg (ºC)	Min (ºC)	Max (ºC)	Avg (ºC)	Min (ºC)	Max (ºC)	Avg (ºC)
Region 1	25.3	27.1	26.2	25.7	27.5	26.8	20.2	21.4	20.8	15.6	18.2	16.8	16.2	19.1	17.7	14.9	16.7	15.8	13.6	16.4	14.7	14.4	16.5	15.4	12.8	14.6	13.8	12.8	15.3	13.8	13.6	16	14.7	12.5	14.6	13.5
Region 2	23.2	25.4	24.4	23.7	25.5	24.5	20.4	21.7	21	15.1	18.7	16.1	15.4	17.5	16.4	14.8	16.2	15.5	13.4	15.4	14.3	13.8	15.4	14.6	12.6	14.5	13.7	12.4	14.7	13.5	13.2	15.8	13.9	12.8	14.3	13.6
Region 3	22.7	24.5	23.6	22.9	24.4	23.6	20.6	21.6	21.1	14.8	16.8	15.7	15	17.3	16	14.7	16.4	15.6	13.4	15.3	14.2	13.4	15.4	14.3	12.5	14.4	13.5	12.5	14.5	13.4	12.5	14.9	13.7	12.1	14.2	13.3
Region 4	23.2	24.5	23.9	23.4	24.5	23.9	20.8	21.8	21.3	14.8	16.9	15.8	15.1	17.5	16	14.2	16.4	15.2	13.3	15.3	14.2	13.3	16.3	14.4	12.6	16.3	13.5	12.5	14.7	13.6	12.8	14.7	13.8	12.2	14.8	13.4
Region 5	23.2	24.5	23.8	23.2	24.5	23.8	21.2	22.4	21.9	14.9	17	15.8	15.2	17.5	15.9	14.1	16.8	15.5	13.5	15.7	14.3	13.3	15.2	14.3	12.6	14.7	13.8	12.9	18.1	13.8	12.8	15.6	13.7	12.5	14.8	13.7
Region 6	28.3	30.3	29.4	28.5	30.2	29.4	19.7	21.2	20.5	15.6	19.7	17.1	16.3	20.8	18.1	14.4	16.3	15.5	13.9	16.7	15	14.4	17.6	15.6	12.6	14.5	13.8	12.8	15.1	13.9	13.9	16	14.8	11.9	15	13.4
Region 7	25.1	26.4	25.7	25.6	26.7	26.2	19.9	21	20.6	15.1	17.3	16.2	15.5	18.1	16.7	14.1	15.5	14.8	13.4	15.5	14.4	14.1	15.9	14.8	12.4	14	13.3	12.6	15.2	13.5	13.2	15.1	14.1	11.9	16.1	13.1
Region 8	23.3	24.6	23.9	23.4	25.2	24.1	20	21.2	20.6	14.8	17	15.8	15.1	17.9	16.2	14	15.6	14.7	13.6	15.5	14.4	13.7	15.5	14.6	11.9	14.1	13.2	12.9	14.7	13.5	12.9	14.8	13.9	12	14.5	13
Region 9	23.8	24.9	24.3	23.8	25.4	24.5	20.2	21.3	20.8	14.7	17.7	15.6	14.8	17.8	15.9	14.8	16	15.4	13.5	17	14.3	13.4	15.5	14.4	12.8	14.4	13.6	12.8	14.6	13.6	12.6	14.8	13.8	12.6	13.9	13.3
Region 10	24.1	25.4	24.7	23.8	25.4	24.5	20.7	21.8	21.2	14.7	17.8	15.9	14.8	17.2	15.7	14.9	18.7	16	13.6	15.5	14.5	13.5	15.8	14.3	13.4	14.9	14.1	13	15.2	13.9	13.1	17	13.9	13.1	16.4	13.7
